# Supplementary material
Source: Springer Nature journal article supplement (https://www.springermedizin.de/resource/supplementary/12967_2011_704_MOESM1_ESM.pdf/9577318)

a.

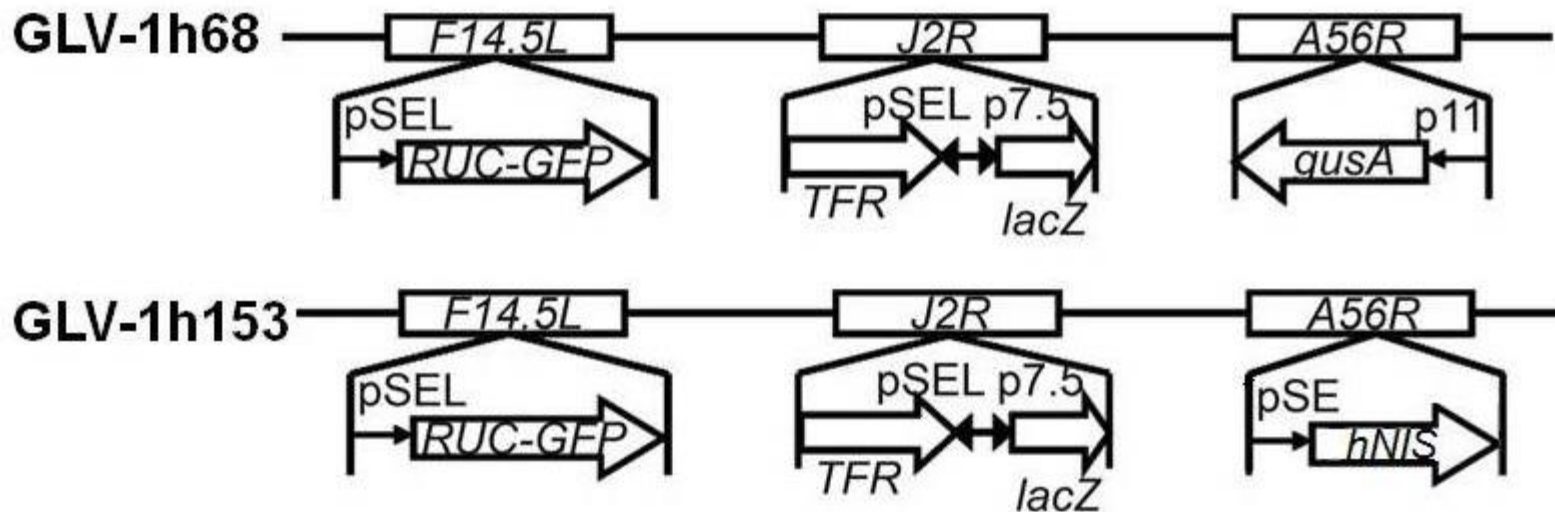

b.

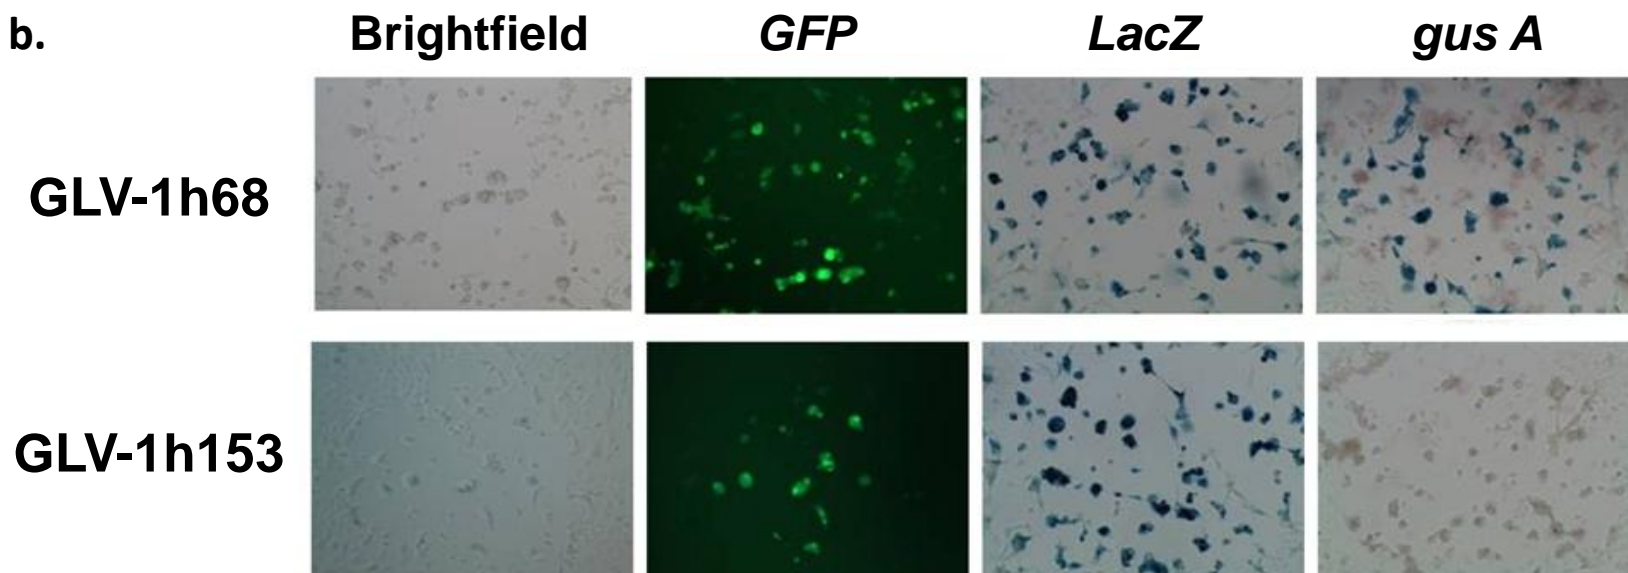

Supplement: MOESM1 [file 9577318]
